# Supplementary material
Source: publisher site journal article supplement (https://www.dovepress.com/article/499613)
Supplement: Supplementary file 1 [file get_supplementary_file.php]

**Supplementary Tables**

**Supplementary Table 1.** Multiple linear regression analysis

| Variable | Estimate | Standard error | |t| | *p* value |
| --- | --- | --- | --- | --- |
| IBS-SSS | -0.1228 | 0.089 | 1.370 | 0.173 |
| IBS-QOL | -1.025 | 1.337 | 0.7663 | 0.445 |
| HADS-depression | -6.399 | 2.148 | 2.979 | 0.004 |
| HADS-anxiety | -3.910 | 4.767 | 0.8202 | 0.414 |
| PHQ-9 | 6.878 | 4.772 | 1.441 | 0.152 |
| VSI | -0.5161 | 0.157 | 3.276 | 0.001 |

To assess the possible association between somatic/psychological symptoms and QOL of IBS-D and serum omentin-1 levels, the linear regression was used for multivariate analyses. Multivariate models for the outcomes of interest were adjusted for the variables as relevant confounders, including inflammatory cytokines (IL-1β, IL-8, IL-6, and TNF-α) as well as other confounders (age, BMI, sex, work, marriage, education). *p* < 0.05 was considered statistically significant.
